# Supplementary material for: Remodeling of the Dermal Extracellular Matrix in a Tissue-Engineered Psoriatic Skin Model by n-3 Polyunsaturated Fatty Acids
Source: MDPI journal article supplement (doi:10.3390/biomedicines10051078), 2022-05-06
Supplement: s1 [file s1]

## Supplementary Materials

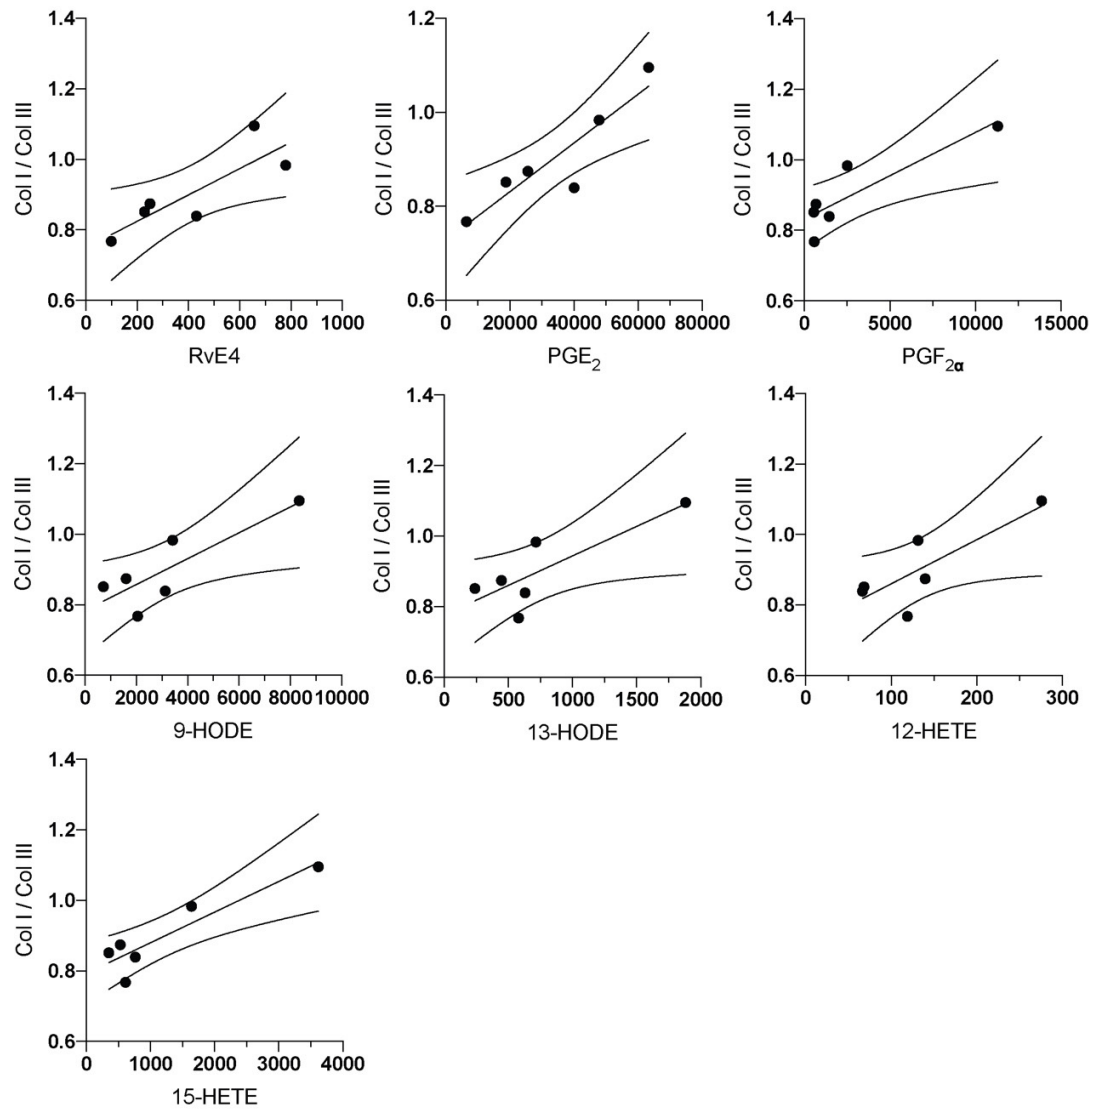

**Figure S1.** Linear regression analyses assessing the correlation of ECM proteins to specific lipid mediators. The correlation coefficient was determined according to Pearson's correlation coefficient ( $r$ ), and the significance according to two-tailed test  $p$ -value ( $p$ ).

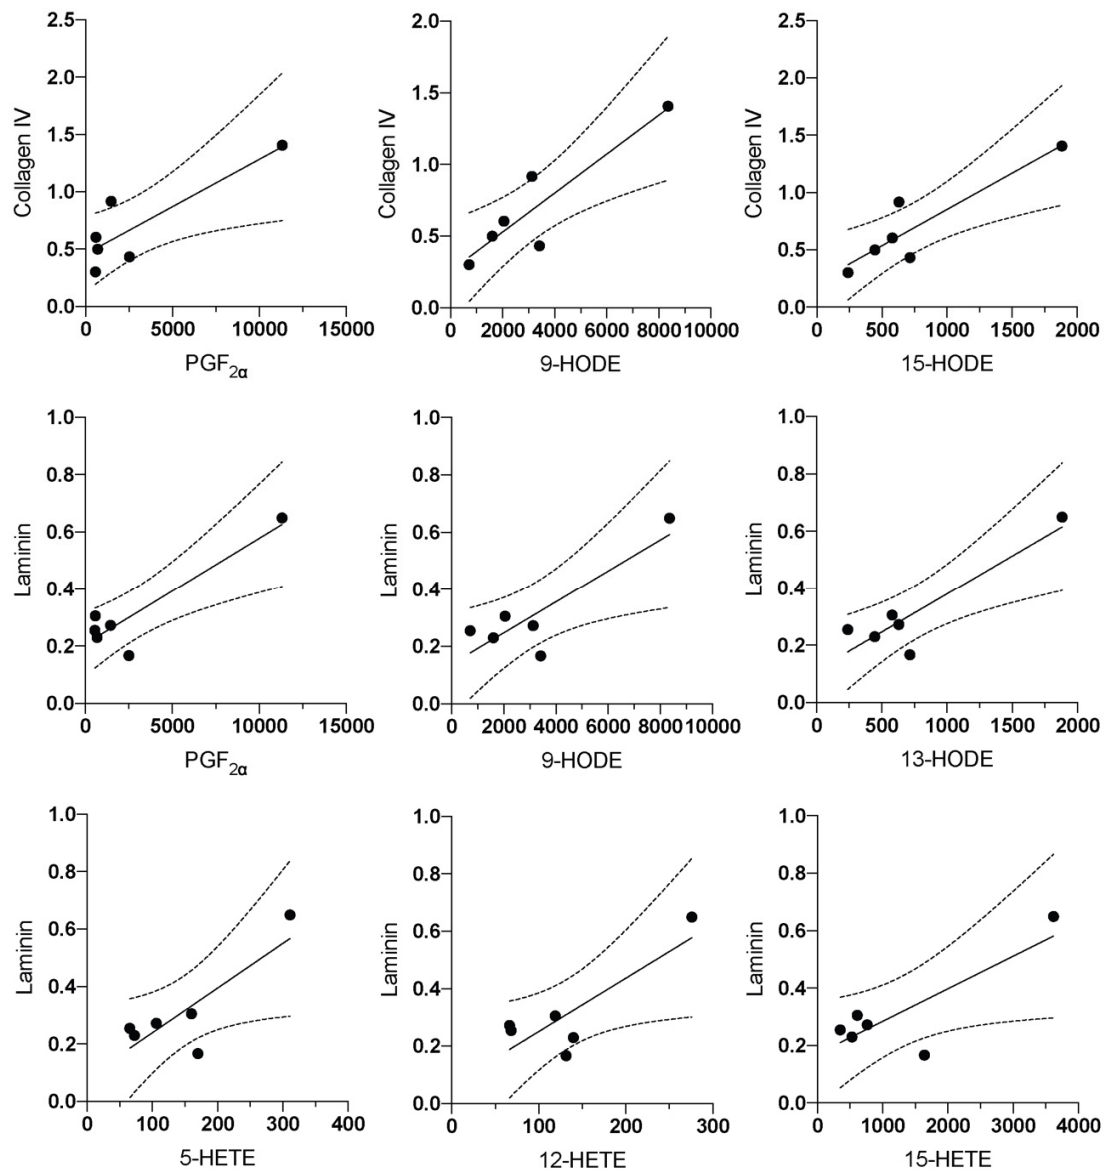

**Figure S2.** Linear regression analyses assessing the correlation of ECM proteins to specific lipid mediators. The correlation coefficient was determined according to Pearson's correlation coefficient ( $r$ ), and the significance according to two-tailed test  $p$ -value ( $p$ ).

**Table S1. Antibodies used for immunofluorescence and dot blot analyses.**

| <b>Antibody</b>                          | <b>Species</b>    | <b>Manufacturer</b>                             | <b>Catalog number</b> | <b>Dilution IF</b> | <b>Dilution DB</b> |
|------------------------------------------|-------------------|-------------------------------------------------|-----------------------|--------------------|--------------------|
| Anti-Collagen I                          | Polyclonal rabbit | Cedarlane<br>(Burlington, ON, Canada)           | CL50111AP-1           | 1:100              | 1:2000             |
| Anti-Collagen III                        | Polyclonal rabbit | Cedarlane<br>(Burlington, ON, Canada)           | CL50311AP-1           | 1:100              | 1:2000             |
| Anti-Collagen IV                         | Polyclonal rabbit | Abcam<br>(Cambridge, UK)                        | ab21295               | 1:100              | 1:1000             |
| Anti-Fibronectin                         | Monoclonal mouse  | ATCC<br>(Manassas, VA, USA)                     | CRL-1606              | 1:100              | 1:500              |
| Anti-Elastin                             | Polyclonal rabbit | Abcam<br>(Cambridge, UK)                        | ab21610               | 1:30               | 1:1000             |
| Anti-Laminin                             | Polyclonal rabbit | Abcam<br>(Cambridge, UK)                        | ab11575               | 1:100              | 1:1000             |
| Anti-GAPDH                               | Polyclonal mouse  | BioLegend<br>(San Diego, CA, USA)               | 649202                | -                  | 1:8000             |
| Anti-rabbit Alexa 488                    | Polyclonal donkey | Life Technologies<br>(Oakville, ON, Canada)     | A21206                | 1:1600             | -                  |
| Anti-rabbit Alexa 594                    | Polyclonal goat   | Life Technologies<br>(Oakville, ON, Canada)     | A11012                | 1:1400             | -                  |
| Anti-mouse Alexa 594                     | Polyclonal goat   | Life Technologies<br>(Oakville, ON, Canada)     | A11005                | 1:1400             | -                  |
| Anti-Rabbit Horseradish Peroxidase (HRP) | Polyclonal goat   | Jackson ImmunoResearch<br>(West Grove, PA, USA) | 111-035-003           | -                  | 1:60000            |
| Anti-Mouse Horseradish Peroxidase (HRP)  | Polyclonal goat   | Jackson ImmunoResearch<br>(West Grove, PA, USA) | 115-035-003           | -                  | 1:60000            |

Abbreviations: IF, immunofluorescence; DB, dot blot

**Table S2. Specific mass transitions and retention times of the metabolites analyzed by LC-MS/MS.**

| Bioactive lipids  | ISTD                             | Q1 → Q3         | Retention time (min) | Detection limit (fmol) |
|-------------------|----------------------------------|-----------------|----------------------|------------------------|
| 9-HODE            | 13-HODE-d <sub>4</sub>           | 295.30 → 171.35 | 9.48                 | 5                      |
| 13-HODE           | 13-HODE-d <sub>4</sub>           | 295.50 → 195.30 | 9.48                 | 5                      |
| PGE <sub>2</sub>  | PGE <sub>2</sub> -d <sub>4</sub> | 351.20 → 271.15 | 5.07                 | 5                      |
| PGF <sub>2a</sub> | PGE <sub>2</sub> -d <sub>4</sub> | 353.40 → 309.30 | 4.83                 | 5                      |
| 5-HETE            | 15-HETE-d <sub>8</sub>           | 319.30 → 115.05 | 10.19                | 25                     |
| 12-HETE           | 15-HETE-d <sub>8</sub>           | 319.10 → 179.25 | 10.11                | 50                     |
| 15-HETE           | 15-HETE-d <sub>8</sub>           | 319.40 → 219.30 | 9.76                 | 50                     |
| PGE <sub>3</sub>  | PGE <sub>2</sub> -d <sub>4</sub> | 349.30 → 269.35 | 4.3                  | 5                      |
| PGF <sub>3a</sub> | PGE <sub>2</sub> -d <sub>4</sub> | 351.30 → 193.30 | 4.08                 | 5                      |
| 12-HEPE           | 15-HETE-d <sub>8</sub>           | 317.30 → 179.35 | 9.13                 | 25                     |
| 15-HEPE           | 15-HETE-d <sub>8</sub>           | 317.40 → 219.25 | 9.04                 | 50                     |
| 18-HEPE           | 15-HETE-d <sub>8</sub>           | 317.30 → 259.40 | 8.7                  | 25                     |
| RvE4              | RvD2-d <sub>5</sub>              | 349.30 → 195.20 | 3.91                 | 50                     |
| LTB <sub>5</sub>  | LTB <sub>4</sub> -d <sub>4</sub> | 333.40 → 195.25 | 6.61                 | 50                     |
| 14-HDHA           | 15-HETE-d <sub>8</sub>           | 343.50 → 281.30 | 10.59                | 50                     |
| 17-HDHA           | 15-HETE-d <sub>8</sub>           | 343.50 → 281.30 | 10.43                | 50                     |
| RvD5              | RvD2-d <sub>5</sub>              | 359.40 → 199.25 | 7.51                 | 50                     |
| MaR2              | RvD2-d <sub>5</sub>              | 359.40 → 221.05 | 8.2                  | 50                     |

**Table S3 Levels of bioactive lipids in skin substitutes after ALA supplementation.**

| Bioactive lipid mediators           | Mean $\pm$ SD (pmol/g of tissue) |                       |                      | P-value                               |                                    |
|-------------------------------------|----------------------------------|-----------------------|----------------------|---------------------------------------|------------------------------------|
|                                     | HS <sup>-</sup>                  | PS <sup>-</sup>       | PS <sup>ALA+</sup>   | PS <sup>-</sup> vs PS <sup>ALA+</sup> | PS <sup>-</sup> vs HS <sup>-</sup> |
| <b>LA derivatives</b>               |                                  |                       |                      |                                       |                                    |
| 9-HODE                              | 1000.9 $\pm$ 723.9               | 4968.4 $\pm$ 2936.2   | 1456.4 $\pm$ 678.7   | 0.0341                                | 0.0324                             |
| 13-HODE                             | 2205.1 $\pm$ 1089.5              | 1076.6 $\pm$ 698.9    | 421.9 $\pm$ 171.6    | NS                                    | NS                                 |
| <b>AA derivatives</b>               |                                  |                       |                      |                                       |                                    |
| PGE <sub>2</sub>                    | 4137.4 $\pm$ 1984.2              | 50412.4 $\pm$ 11836.0 | 16988.0 $\pm$ 9699.4 | 0.0001                                | 0.0001                             |
| PGF <sub>2<math>\alpha</math></sub> | 956.9 $\pm$ 965.3                | 5090.0 $\pm$ 5407.7   | 604.9 $\pm$ 64.4     | NS                                    | NS                                 |
| 5-HETE                              | 138.3 $\pm$ 91.6                 | 195.6 $\pm$ 104.8     | 99.3 $\pm$ 52.5      | NS                                    | NS                                 |
| 12-HETE                             | 177.3 $\pm$ 88.4                 | 157.9 $\pm$ 107.3     | 109.1 $\pm$ 36.9     | NS                                    | NS                                 |
| 15-HETE                             | 448.5 $\pm$ 500.4                | 2009.1 $\pm$ 1462.8   | 497.9 $\pm$ 132.7    | 0.0120                                | 0.0198                             |
| AEA                                 | 0.9 $\pm$ 1.5                    | 102.4 $\pm$ 18.1      | 89.9 $\pm$ 30.0      | NS                                    | 0.0021                             |
| <b>ALA derivatives</b>              |                                  |                       |                      |                                       |                                    |
| 13-HOTrE                            | ND                               | ND                    | 115.5 $\pm$ 82.9     | NS                                    | NS                                 |
| <b>EPA derivatives</b>              |                                  |                       |                      |                                       |                                    |
| PGE <sub>3</sub>                    | 82.8 $\pm$ 25.7                  | 1001.0 $\pm$ 399.5    | 9395.1 $\pm$ 6651.4  | 0.0069                                | NS                                 |
| PGF <sub>3<math>\alpha</math></sub> | 119.6 $\pm$ 37.1                 | ND                    | 137.9 $\pm$ 143.2    | NS                                    | NS                                 |
| 12-HEPE                             | 2.5 $\pm$ 2.7                    | ND                    | 61.8 $\pm$ 30.2      | NS                                    | NS                                 |
| 15-HEPE                             | 24.0 $\pm$ 18.0                  | 39.3 $\pm$ 43.4       | 240.7 $\pm$ 80.9     | 0.0001                                | NS                                 |
| 18-HEPE                             | 13.9 $\pm$ 11.7                  | ND                    | 251.7 $\pm$ 60.8     | 0.0001                                | NS                                 |
| RvE4                                | ND                               | 622.6 $\pm$ 176.8     | 192.7 $\pm$ 81.6     | 0.0081                                | 0.0012                             |
| EPEA                                | 2.2 $\pm$ 2.0                    | 0.5 $\pm$ 0.3         | 7.1 $\pm$ 4.7        | NS                                    | NS                                 |
| <b>DHA derivatives</b>              |                                  |                       |                      |                                       |                                    |
| 14-HDHA                             | 100.9 $\pm$ 77.0                 | 55.1 $\pm$ 51.0       | 403.5 $\pm$ 166.9    | NS                                    | NS                                 |
| 17-HDHA                             | 364.2 $\pm$ 282.1                | 1365.6 $\pm$ 1736.1   | 186.7 $\pm$ 99.3     | NS                                    | NS                                 |
| MaR2                                | 333.4 $\pm$ 112.9                | 40.3 $\pm$ 3.5        | 26.8 $\pm$ 4.9       | NS                                    | 0.0031                             |
| DHEA                                | 37.7 $\pm$ 40.4                  | 4.4 $\pm$ 2.4         | 14.5 $\pm$ 10.0      | NS                                    | NS                                 |

**Abbreviations:** AA, arachidonic acid; ALA,  $\alpha$ -linolenic acid; DGLA, dihomo-gamma-linolenic acid; DHA, docosahexaenoic acid; EPA, eicosapentaenoic acid; HEPE, hydroxyeicosapentaenoic acid; HETE, hydroperoxyeicosatetraenoic acid; HETrE, hydroxyeicosatrienoic acid; HDHA, hydroxydocosahexaenoic acid; HODE, hydroxyoctadecadienoic acid; LA, linoleic acid; LT, Leukotriene; ND, not detected; NS, not significant; PG, prostaglandin; Rv, Resolvin; SD, standard deviation.
